# Supplementary material
Source: publisher figshare collection journal article supplement (https://brill.figshare.com/ndownloader/files/38515763)
Supplement: Supplementary file 1 [file 38515763]

TABLE A1 Overview of all cores taken from the roof timbers of the Church of St. Nicholas, Ghent

| Building | Phase | Construction timber | Tree–ring series | Wood species | Status | Length | Start | End | Pith | Pith offset (cm) | ns | Unmeasured rings | WaneyEdge |
| --- | --- | --- | --- | --- | --- | --- | --- | --- | --- | --- | --- | --- | --- |
| Church of St. Nicholas | Choir, youngest phase | Truss post, principal truss at the apse, south side | GNT_SNK_01 | QUSP | Undated | 52 |  |  | – |  | 3 |  | – |
| Church of St. Nicholas | Choir, youngest phase | Rafter, south side apse | GNT_SNK_02 | QUSP | Undated | 33 |  |  | – |  | 3 | 1 | – |
| Church of St. Nicholas | Choir, youngest phase | Rafter, south side apse | GNT_SNK_03 | QUSP | Undated | 46 |  |  | – | 1 | 9 | 1 | – |
| Church of St. Nicholas | Choir, youngest phase | Tiebeam, apse | GNT_SNK_04 | QUSP | Undated | 40 |  |  | – | 3 | 12 | 1 | – |
| Church of St. Nicholas | Choir, youngest phase | Rafter, north side apse | GNT_SNK_05 | QUSP | Undated | 43 |  |  | – |  | 14 |  | – |
| Church of St. Nicholas | Choir, youngest phase | Rafter, north side, 3rd truss starting from the apse | GNT_SNK_06 | QUSP | Undated | 32 |  |  | P |  | 9 | 1 | – |
| Church of St. Nicholas | Choir, youngest phase | Truss post, north side, 2nd principal truss from the east | GNT_SNK_07 | QUSP | Undated | 31 |  |  | – | 2.5 | 4 |  | – |
| Church of St. Nicholas | Choir, youngest phase | Rafter, 13th truss from the east | GNT_SNK_08 | QUSP | Undated | 30 |  |  | – | 2 | 1 |  | – |
| Church of St. Nicholas | Choir, oldest phase | First tiebeam on the eastside | GNT_SNK_09 | QUSP | Dated | 125 | 1092 | 1216 | – | 1 | 2 | 1 | – |
| Church of St. Nicholas | Choir, oldest phase | Rafter, 4th truss from first, eastmost tiebeam, north side | GNT_SNK_10m2 | QUSP | Dated | 173 | 1059 | 1231 | – | 2 | 8 |  | – |
| Church of St. Nicholas | Choir, oldest phase | Rafter, 6th truss from first, eastmost tiebeam, north side | GNT_SNK_11m | QUSP | Dated | 62 | 1129 | 1190 | – | 2 |  |  | – |
| Church of St. Nicholas | Choir, oldest phase | Rafter, 7th truss from first, eastmost tiebeam, north side | GNT_SNK_12 | QUSP | Dated | 131 | 1076 | 1206 | – | 1.5 |  |  | – |
| Church of St. Nicholas | Choir, oldest phase | Rafter, 2nd truss from first, eastmost tiebeam, south side | GNT_SNK_13 | QUSP | Dated | 98 | 1122 | 1219 | – | 1.5 |  | 1 | – |
| Church of St. Nicholas | Choir, oldest phase | Rafter, on second tiebeam from the east | GNT_SNK_14 | QUSP | Dated | 88 | 1128 | 1215 | – | 1.5 | 3 |  | – |
| Church of St. Nicholas | Choir, oldest phase | Rafter, 5th truss from first, eastmost tiebeam, north side | GNT_SNK_15 | QUSP | Dated | 119 | 1094 | 1212 | – | 4.5 |  |  | – |
| Church of St. Nicholas | Choir, oldest phase | Rafter, 3rd truss from the 3rd principal Truss, north side | GNT_SNK_16 | QUSP | Dated | 117 | 1107 | 1223 | – | 2.5 |  |  | – |
| Church of St. Nicholas | Choir, oldest phase | Rafter, 5rd truss from the 3rd principal Truss, north side | GNT_SNK_17 | QUSP | Dated | 159 | 1066 | 1224 | – | 1 |  |  | – |
| Church of St. Nicholas | Choir, oldest phase | Rafter, 6th truss from the first tiebeam, south side | GNT_SNK_18 | QUSP | Dated | 108 | 1123 | 1230 | – | 1 | 11 | 1 | – |
| Church of St. Nicholas | Nave | Rafter, 14th truss from the east, south side | GNT_SNK_19 | QUSP | Dated | 109 | 1108 | 1216 | P |  | 13 |  | – |
| Church of St. Nicholas | Nave | Rafter, 18th truss from the east, south side | GNT_SNK_20 | QUSP | Dated | 135 | 1075 | 1209 | – | 1 | 24 |  | – |
| Church of St. Nicholas | Nave | Rafter, 23rd truss from the east, south side | GNT_SNK_21 | QUSP | Dated | 101 | 1100 | 1200 | – | 2.5 |  |  | – |
| Church of St. Nicholas | Nave | Rafter, 28th truss from the east, south side | GNT_SNK_22 | QUSP | Undated | 94 |  |  | – | 1 |  |  | – |
| Church of St. Nicholas | Nave | Rafter, 31st truss from the east, south side | GNT_SNK_23 | QUSP | Dated | 144 | 1068 | 1211 | – |  | 25 |  | – |
| Church of St. Nicholas | Nave | Rafter, 35th truss from the east, north side | GNT_SNK_24 | QUSP | Undated | 45 |  |  | – |  | 0 | 3 | – |
| Church of St. Nicholas | Nave | Rafter, 29th truss from the east, north side | GNT_SNK_25 | QUSP | Undated | 71 |  |  | – |  | 15 |  | – |
| Church of St. Nicholas | Nave | Rafter, 27th truss from the east, north side | GNT_SNK_26 | QUSP | Dated | 138 | 1069 | 1206 | – |  |  |  | – |
| Church of St. Nicholas | Nave | Rafter, 23rd truss from the east, north side | GNT_SNK_27 | QUSP | Dated | 90 | 1131 | 1220 | P |  | 16 | 1 | – |
| Church of St. Nicholas | Nave | Rafter, 17th truss from the east, north side | GNT_SNK_28 | QUSP | Dated | 81 | 1140 | 1220 | – |  | 20 |  | – |
| Church of St. Nicholas | Nave | Rafter, 16th truss from the east, north side | GNT_SNK_29 | QUSP | Dated | 114 | 1106 | 1219 | – |  | 19 |  | – |
| Church of St. Nicholas | Nave | Rafter, 11th truss from the east, north side | GNT_SNK_30 | QUSP | Dated | 55 | 1147 | 1201 | – |  |  |  | – |
| Church of St. Nicholas | Nave | Ashlar-piece, 11th truss from the east, north side | GNT_SNK_31 | QUSP | Undated | 65 |  |  | P |  | 6 | 1 | – |
| Church of St. Nicholas | Nave | Ashlar-piece, 9th truss from the east, north side | GNT_SNK_32 | QUSP | Undated | 90 |  |  | – |  | 23 |  | – |
| Church of St. Nicholas | Nave | Truss post, first principal Truss from the east | GNT_SNK_33 | QUSP | Undated | 41 |  |  | – |  | 11 |  | – |
| Church of St. Nicholas | Nave | Brace, 2nd truss from the east | GNT_SNK_34 | QUSP | Undated | 58 |  |  | – |  | 6 |  | – |
| Church of St. Nicholas | Nave | Truss post, 3rd principal truss from the east | GNT_SNK_35 | QUSP | Undated | 129 |  |  | – |  | 19 |  | – |
| Church of St. Nicholas | Nave | Roof plate, between 2nd and 3rd Principal truss from the east, north side | GNT_SNK_36m | QUSP | Undated | 156 |  |  | – |  | 20 | 1 | – |
| Church of St. Nicholas | Nave | Superimposed tiebeam, 2nd principal truss from the east | GNT_SNK_37 | QUSP | Undated | 56 |  |  | P |  |  |  | – |
| Church of St. Nicholas | Choir, youngest phase | Horizontal beam, south side apse | GNT_SNK_38 | QUSP | Undated | 34 |  |  | – |  |  |  | – |
| Church of St. Nicholas | Choir, youngest phase | Trimmer, east side apse | GNT_SNK_39 | QUSP | Undated | 27 |  |  | – |  | 4 |  | – |
| Church of St. Nicholas | Choir, youngest phase | Ashlar-piece, east side apse | GNT_SNK_40 | QUSP | Undated | 46 |  |  | – |  | 2 |  | – |
| Church of St. Nicholas | Choir, youngest phase | Rafter, east side apse | GNT_SNK_41 | QUSP | Undated | 36 |  |  | – |  | 8 |  | – |

*n*s, number of sapwood rings; unmeasured rings, rings observed on the core but not measured due to incompleteness; WaneyEdge, presence of the cambial zone, it implies the core sample is complete to the last year of growth.
